# Supplementary material for: Synthesis of rattle-type magnetic mesoporous Fe3O4@mSiO2@BiOBr hierarchical photocatalyst and investigation of its photoactivity in the degradation of methylene blue
Source: Royal Society of Chemistry journal article supplement (doi:10.1039/c5ra06894k), 2015-01-01
Supplement: c5ra06894k1.pdf [file c5ra06894k1.pdf]

## Supporting Information

# Synthesis of rattle-type magnetic mesoporous $\text{Fe}_3\text{O}_4@m\text{SiO}_2@m\text{BiOBr}$ hierarchical photocatalyst and its photoactivity investigation in degradation of methylene blue

Wei Li,<sup>a,b</sup> Yi Tian,<sup>a,b</sup> Peitao Li,<sup>a,b</sup> Baoliang Zhang,<sup>a,b</sup> Hepeng Zhang,<sup>a,b</sup> Wangchang Geng,<sup>\*a,b</sup> Qiuyu

Zhang<sup>\*a,b</sup>

<sup>a</sup>Department of Applied Chemistry, College of Science, Northwestern Polytechnical University,

Xi'an 710072, China

<sup>b</sup>Key Laboratory of Space Physics and Chemistry, Ministry of Education, Northwestern

Polytechnical University, P. O. Box 624, Xi'an 710072, China

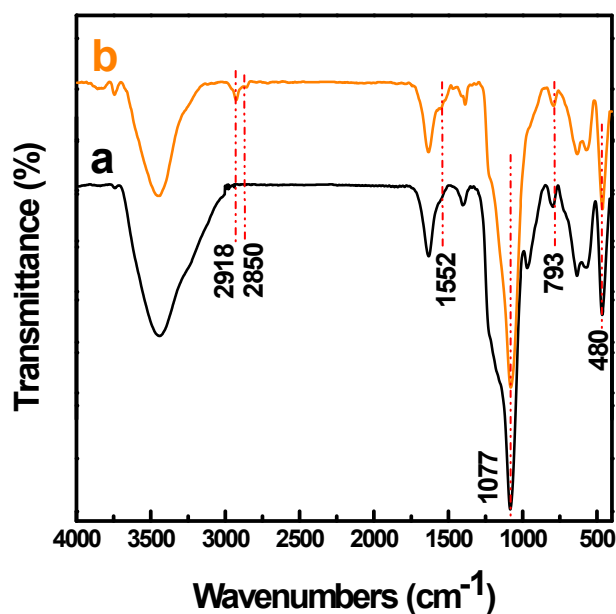

Fig.S1 FTIR spectra of rattle-type  $\text{Fe}_3\text{O}_4@m\text{SiO}_2$  (a) and  $\text{R-Fe}_3\text{O}_4@m\text{SiO}_2\text{-NH}_2$  (b).

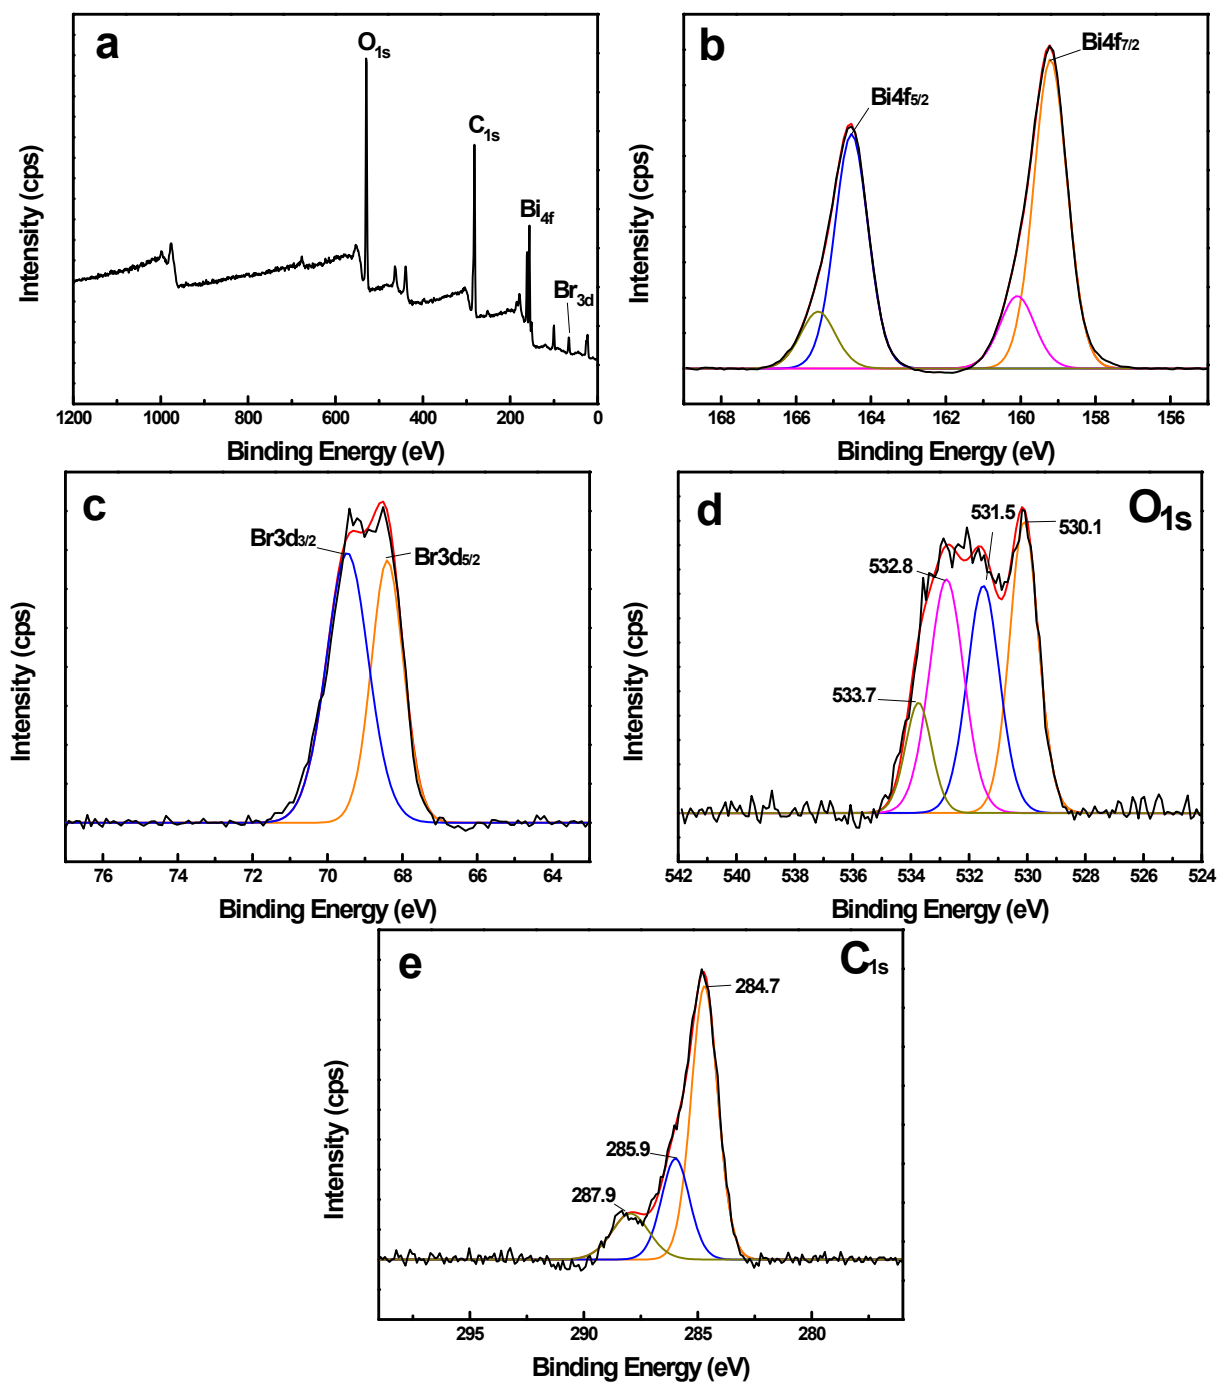

Fig.S2 XPS spectra of the R- $Fe_3O_4@mSiO_2@BiOBr$ -1-4 hierarchical photocatalyst.

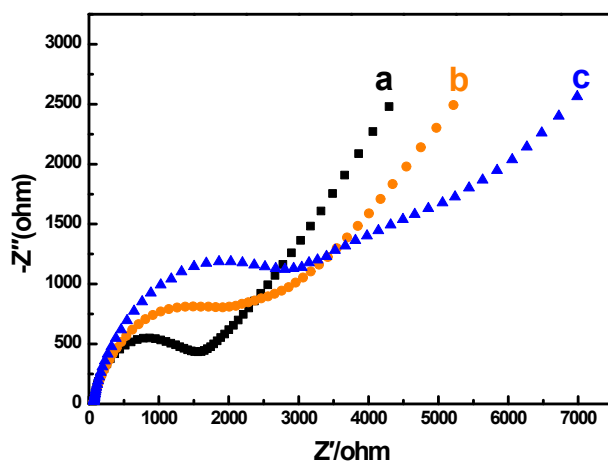

Fig.S3 EIS of R-Fe<sub>3</sub>O<sub>4</sub>@mSiO<sub>2</sub>@BiOBr-1-4 (a), R-Fe<sub>3</sub>O<sub>4</sub>@mSiO<sub>2</sub>@BiOBr-0.4-4 (b) and pure BiOBr (c), respectively.

Electrochemical impedance spectroscopy (EIS) measurements were also employed to investigate the charge transfer resistance and the separation efficiency between the photogenerated electrons and holes. Using Fe(CN)<sub>6</sub><sup>3-/4-</sup> as the electrochemical probe, the Nyquist plots of different electrodes were obtained (Fig.S3). Obviously, the charge transfer resistance (*R*<sub>ct</sub>) at the R-Fe<sub>3</sub>O<sub>4</sub>@mSiO<sub>2</sub>@BiOBr-1-4 hierarchical photocatalyst (Fig.S3a) is smaller than that of R-Fe<sub>3</sub>O<sub>4</sub>@mSiO<sub>2</sub>@BiOBr-0.4-4 (Fig.S3b) and pure BiOBr (Fig.S3c) alone. Generally, the smaller the arc radius on the EIS Nyquist plot, the lower the charge transfer resistance. Therefore, the EIS results demonstrated that the R-Fe<sub>3</sub>O<sub>4</sub>@mSiO<sub>2</sub>@BiOBr-1-4 hierarchical photocatalyst exhibited more excellent charge transfer ability than the R-Fe<sub>3</sub>O<sub>4</sub>@mSiO<sub>2</sub>@BiOBr-0.4-4 and pure BiOBr alone, which can effectively inhibit the recombination of photoexcited electron-hole pairs and is very beneficial to the enhanced photoactivity.

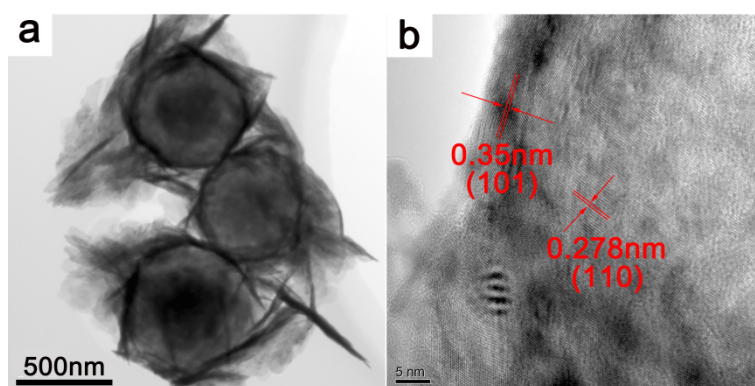

Fig.S4 TEM (a) and HRTEM (b) images of the recovered R-Fe<sub>3</sub>O<sub>4</sub>@mSiO<sub>2</sub>@BiOBr-1-4 hierarchical photocatalyst.
